# Supplementary material
Source: PubMed Central journal article supplement (PMC5628774)
Supplement: mmc1.pdf [file mmc1.pdf]

**YMTHE, Volume 25**

**Supplemental Information**

**TLR9-Mediated Conditioning of Liver Environment**

**Is Essential for Successful Intrahepatic**

**Immunotherapy and Effective Memory Recall**

**Marcin Cebula, Mathias Riehn, Upneet Hillebrand, Ramona F. Kratzer, Florian Kreppel, Georgia Koutsoumpli, Toos Daemen, Hansjörg Hauser, and Dagmar Wirth**

# Supplemental Figure S1

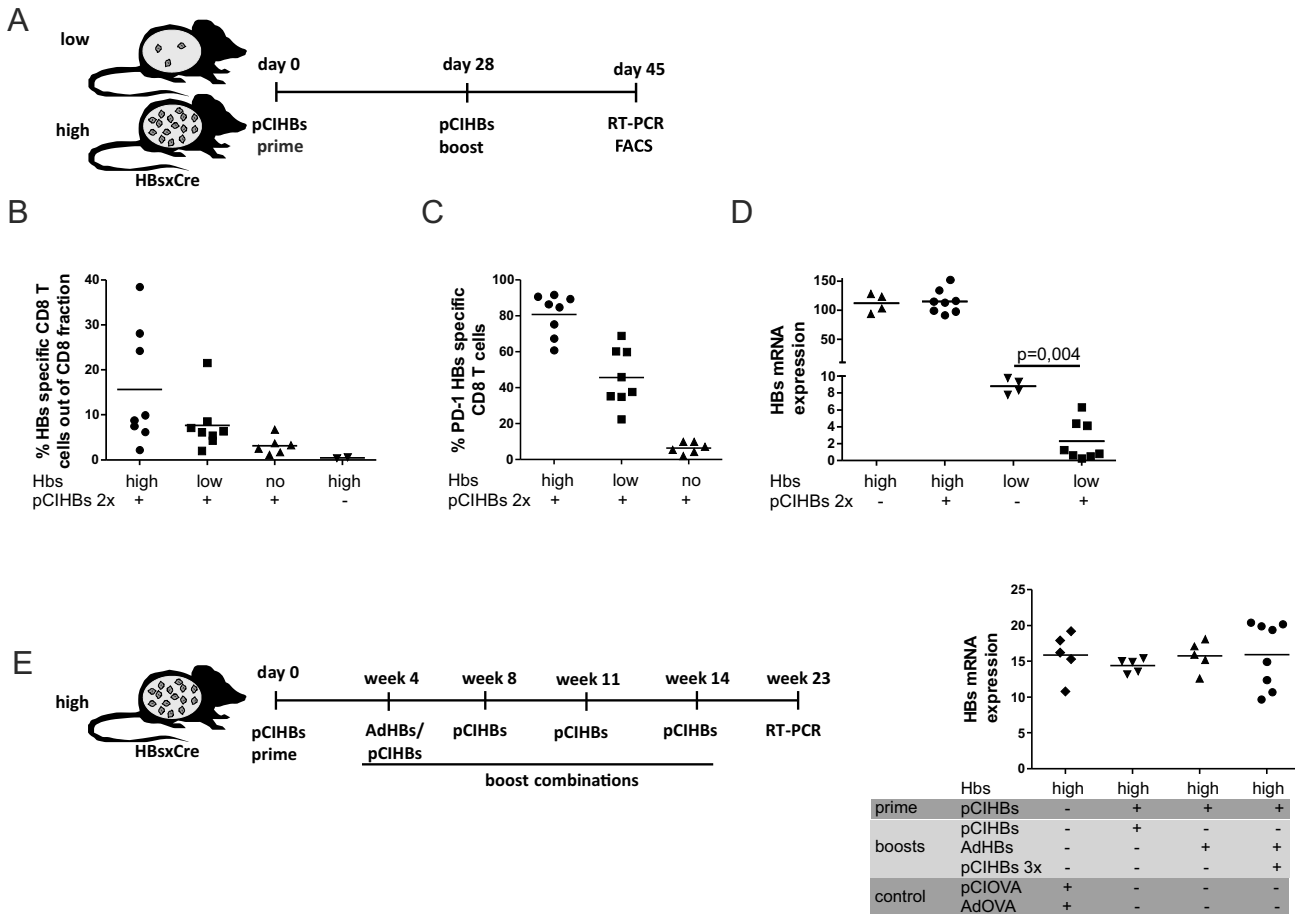

**Figure S1. Vaccination of HBsxCre mice with standard vaccination regimes.** (A) HBsxCre mice were vaccinated with pCIHBs prime / pCIHBs boost regime and were analysed on day 45. (B) Frequency of HBs specific CD8 T cells on day 45 post vaccination, stained with HBs specific pentamers. (C) PD-1 determined on intrahepatic HBs specific CD8 T cells. (D) Relative HBs mRNA expression determined by RT-PCR in liver tissue on day 45 post vaccination, (two independent experiments). (E) Various boosting vaccination strategies comprise the following regimes: pCIHBs prime / pCIHBs boost, pCIHBs prime / AdHBs boost and pCIHBs prime / AdHBs boost followed by three subsequent pCIHBs boosts. As control, vaccination was performed with pCIOVAprime / AdOVA boost as a non-cognate antigen. Relative HBs mRNA expression was determined by RT-PCR in liver tissue 2 weeks after boost with pCIHBs or AdHBs, and 9 weeks after triple pCIHBs boosts.
